# Supplementary material for: Gene Expression Responses Linked to Reproduction Effect Concentrations (EC10,20,50,90) of Dimethoate, Atrazine and Carbendazim, in Enchytraeus albidus
Source: PLoS One. 2012 Apr 27;7(4):e36068. doi: 10.1371/journal.pone.0036068 (PMC3338630; doi:10.1371/journal.pone.0036068)
Supplement: Table S1 — Gene expression validation with quantitative Real Time PCR in Enchytraeus albidus when exposed to dimethoate, atrazine or carbendazim using reproduction EC10, EC20, EC50 and EC90. (XLSX) [file pone.0036068.s002.xlsx]

## Sheet: Description
Gene Expression Responses Linked to Reproduction Effect Concentrations (EC10,20,50,90) of Dimethoate, Atrazine and Carbendazim, in Enchytraeus albidus
Sara C. Novais*, Wim De Coen & Mónica J.B. Amorim
* corresponding author: sara.novais@ua.pt
Journal PLoS ONE
Table S1:
Gene expression validation with quantitative Real Time PCR in Enchytraeus albidus when exposed to dimethoate, atrazine or carbendazim using reproduction EC10, EC20, EC50 and EC90.
Description Table S1:
Blast Homology		Protein name after Blast homology search.
Cluster ID		Gene cluster as can be found in EnchyBASE
EC10		Pesticide concentration that causes 10% reduction in reproduction.
EC20		Pesticide concentration that causes 20% reduction in reproduction.
EC50		Pesticide concentration that causes 50% reduction in reproduction.
EC90		Pesticide concentration that causes 90% reduction in reproduction.
MA		Log2 ratios of gene expression after microarray analysis
qPCR		Log2 ratios of gene expression after quantitative real-time RT PCR
± SE		Standard error

## Sheet: Table S1
Table S1: Gene expression validation with quantitative Real Time PCR in Enchytraeus albidus when exposed to dimethoate, atrazine or carbendazim using reproduction EC10, EC20, EC50 and EC90. (-) not tested
		Dimethoate												Atrazine												Carbendazim
Blast Homology	Cluster ID	EC10			EC20			EC50			EC90			EC10			EC20			EC50			EC90			EC10			EC20			EC50			EC90
		MA	qPCR	± SE	MA	qPCR	± SE	MA	qPCR	± SE	MA	qPCR	± SE	MA	qPCR	± SE	MA	qPCR	± SE	MA	qPCR	± SE	MA	qPCR	± SE	MA	qPCR	± SE	MA	qPCR	± SE	MA	qPCR	± SE	MA	qPCR	± SE
heat shock protein 90	EAC00488	-0.6296	-0.3704	0.1409	-0.7326	-0.6201	0.1776	0.5301	0.8969	0.0838	0.7517	1.0996	0.0938	0.1984	0.6702	0.252	0.6273	0.5764	0.2223	0.8549	0.8732	0.3624	0.9921	1.0277	0.4023	0.8438	0.5828	0.2205	0.9097	0.6446	0.2452	0.6809	0.4433	0.1693	1.1599	1.2939	0.5146
sec14-like 2	EAC00716	-0.454	-1.0286	0.0865	-0.1595	0.1568	0.0773	-0.1568	-0.2169	0.0242	-0.8504	-0.7234	0.0361	0.2807	0.5138	0.1617	-0.142	0.1284	0.041	-0.7317	-0.3432	0.0722	-0.1302	0.2614	0.0841	-	-	-	-	-	-	-	-	-	-	-	-
retinol dehydrogenase 3	EAC00387	-0.1146	-0.6482	0.104	0.4153	0.628	0.288	-0.3535	-0.1417	0.0324	0.3025	0.7088	0.186	0.0069116	0.6693	0.2358	0.6889	0.629	0.1645	0.3975	0.3615	0.1185	0.7974	0.8132	0.2864	-	-	-	-	-	-	-	-	-	-	-	-
stathmin 1 oncoprotein 18 variant 8	EAC00992	-	-	-	-	-	-	-	-	-	-	-	-	-	-	-	-	-	-	-	-	-	-	-	-	-0.3563	-0.1135	0.0244	-0.3801	-0.0278	0.00707	-1.0599	-1.2058	0.0574	-1.2394	-1.2919	0.0603
superoxide dismutase	EAC00791	-0.0945	-0.1831	0.0415	-0.063	0.0567	0.0312	0.8398	0.6002	0.1271	2.2294	2.7325	0.6085	-	-	-	-	-	-	-	-	-	-	-	-	-	-	-	-	-	-	-	-	-	-	-	-
glucan endo-1,3-beta-glucosidase	EAC00265	-	-	-	-	-	-	-	-	-	-	-	-	-0.2101	1.627	0.6439	0.1567	0.2133	0.0834	0.6901	0.7854	0.3157	0.5571	1.6511	0.6832	0.173	0.1106	0.0544	0.3335	1.2485	0.5879	0.2359	0.0963	0.0515	0.5139	1.2412	0.5781
intermediate filament protein	EAC00181	-	-	-	-	-	-	-	-	-	-	-	-	-	-	-	-	-	-	-	-	-	-	-	-	0.7886	0.6845	0.2905	0.7467	0.6681	0.2831	0.8157	0.6482	0.2718	0.8281	1.2605	0.5631
