# Supplementary material for: Gene Expression Responses Linked to Reproduction Effect Concentrations (EC10,20,50,90) of Dimethoate, Atrazine and Carbendazim, in Enchytraeus albidus
Source: PLoS One. 2012 Apr 27;7(4):e36068. doi: 10.1371/journal.pone.0036068 (PMC3338630; doi:10.1371/journal.pone.0036068)
Supplement: Table S5 — All significant differential expressed genes of the significant ( p <0.05) gene ontology (GO) terms in Enchytraeus albidus , in each of the following lists: 1) uniquely affected by dimethoate; 2) uniquely affected by atrazine; 3) uniquely affected by carbendazim; 4) affected by dimethoate and atrazine; 5) affected by dimethoate and carbendazim; 6) affected by atrazine and carbendazim; 7) affected by the three pesticides. (XLSX) [file pone.0036068.s006.xlsx]

## Sheet: Description
Gene Expression Responses Linked to Reproduction Effect Concentrations (EC10,20,50,90) of Dimethoate, Atrazine and Carbendazim, in Enchytraeus albidus
Sara C. Novais*, Wim De Coen & Mónica J.B. Amorim
* corresponding author: sara.novais@ua.pt
Journal PLoS ONE
Table S5:
All significant differential expressed genes of the significant (p<0.05) gene ontology (GO) terms in Enchytraeus albidus, in each of the following lists: 1) uniquely affected by dimethoate; 2) uniquely affected by atrazine; 3) uniquely affected by carbendazim; 4) affected by dimethoate and atrazine; 5) affected by dimethoate and carbendazim; 6) affected by atrazine and carbendazim; 7) affected by…
Description Table S5:
GO ID		ID number of GO term.
Term		GO term definition
Library annotated		Amount of genes within the GO term on the microarray.
# Sig. Annotated		Amount of genes significantly induced or repressed within the GO term.
Significant genes		Gene cluster ID, as can be found in EnchyBASE, of the genes significantly induced or repressed within the GO term

## Sheet: Table S5
Table S5: All significant differential expressed genes of the significant (p<0.05) gene ontology (GO) terms in Enchytraeus albidus, in each of the following lists: 1) uniquely affected by dimethoate; 2) uniquely affected by atrazine; 3) uniquely affected by carbendazim; 4) affected by dimethoate and atrazine; 5) affected by dimethoate and carbendazim; 6) affected by atrazine and carbendazim; 7) a…
	Only the biological process results are given.
GO ID	Term	Library Annotated	# Sig. Annotated	Significant genes
Genes uniquely affected by dimethoate
GO:0010035	response to inorganic substance	3	3	EAC00182, EAC00183, EAC00577
GO:0045214	sarcomere organization	4	3	EAC00182, EAC00496, EAC01081
GO:0050896	response to stimulus	23	8	EAC00182, EAC00183, EAC00276, EAC00372, EAC01038, EAC00559, EAC00577, EAC00835
GO:0032989	cellular component morphogenesis	11	5	EAC00182, EAC00259, EAC00496, EAC01038, EAC01081
GO:0051592	response to calcium ion	2	2	EAC00182, EAC00183
GO:0007163	establishment or maintenance of cell polarity	2	2	EAC00259, EAC01038
GO:0016070	RNA metabolic process	20	7	EAC00491, EAC01038, EAC01052, EAC00583, EAC00677, EAC00787, EAC00854
Genes uniquely affected by atrazine
GO:0051641	cellular localization	8	2	EAC00350, EAC00221
GO:0031532	actin cytoskeleton reorganization	1	1	EAC00350
GO:0007155	cell adhesion	1	1	EAC00627
GO:0032507	maintenance of protein location in cell	1	1	EAC00350
GO:0070972	protein localization in endoplasmic reticulum	1	1	EAC00221
GO:0008360	regulation of cell shape	1	1	EAC00627
GO:0006616	SRP-dependent cotranslational protein targeting to membrane	1	1	EAC00221
Genes uniquely affected by carbendazim
GO:0051716	cellular response to stimulus	4	3	EAC00181, EAC00363, EAC00484
GO:0048870	cell motility	4	3	EAC00904, EAC01033, EAC01050
GO:0006950	response to stress	13	5	EAC00178, EAC00181, EAC00290, EAC00316, EAC00363
GO:0006066	alcohol metabolic process	5	3	EAC00178, EAC00484, EAC00903
GO:0006259	DNA metabolic process	5	3	EAC00181, EAC00212, EAC00363
GO:0051103	DNA ligation involved in DNA repair	2	2	EAC00181, EAC00363
GO:0016477	cell migration	2	2	EAC00904, EAC01033
GO:0007243	intracellular protein kinase cascade	2	2	EAC00904, EAC01033
GO:0043408	regulation of MAPKKK cascade	2	2	EAC00904, EAC01033
GO:0023014	signal transmission via phosphorylation event	2	2	EAC00904, EAC01033
GO:0006412	Translation	36	9	EAC00200, EAC00226, EAC00408, EAC00476, EAC00482, EAC00520, EAC01014, EAC01078, EAC00663
GO:0044267	cellular protein metabolic process	56	12	EAC00200, EAC00214, EAC00226, EAC00306, EAC00316, EAC00408, EAC00476, EAC00482, EAC00520, EAC01014, EAC01078, EAC00663
GO:0040011	Locomotion	6	3	EAC00904, EAC01033, EAC01050
GO:0048511	rhythmic process	3	2	EAC00178, EAC00408
GO:0042274	ribosomal small subunit biogenesis	3	2	EAC00663, EAC00200
GO:0006281	DNA repair	3	2	EAC00181, EAC00363
GO:0006974	response to DNA damage stimulus	3	2	EAC00181, EAC00363
GO:0010033	response to organic substance	7	3	EAC00178, EAC00316, EAC00484
GO:0006414	translational elongation	12	4	EAC00200, EAC00226, EAC00476, EAC00663
Genes affected by dimethoate and atrazine
GO:0008202	steroid metabolic process	2	2	EAC00387, EAC00716
GO:0006629	lipid metabolic process	6	2	EAC00387, EAC00716
GO:0016070	RNA metabolic process	20	3	EAC00479, EAC00716, EAC00831
GO:0008203	cholesterol metabolic process	1	1	EAC00716
GO:0016101	diterpenoid metabolic process	1	1	EAC00387
GO:0006775	fat-soluble vitamin metabolic process	1	1	EAC00387
GO:0001523	retinoid metabolic process	1	1	EAC00387
GO:0006721	terpenoid metabolic process	1	1	EAC00387
GO:0006396	RNA processing	12	2	EAC00479, EAC00831
GO:0006412	Translation	36	3	EAC00233, EAC00479, EAC00994
GO:0010467	gene expression	99	5	EAC00233, EAC00479, EAC00994, EAC00716, EAC00831
Genes affected by dimethoate and carbendazim
GO:0022607	cellular component assembly	20	5	EAC00340, EAC00354, EAC00377, EAC00485, EAC00616
GO:0007018	microtubule-based movement	4	3	EAC00354, EAC00377, EAC00485
GO:0043623	cellular protein complex assembly	7	4	EAC00354, EAC00377, EAC00485, EAC00616
GO:0023052	Signaling	15	4	EAC00992, EAC01006, EAC00579, EAC00616
GO:0023034	intracellular signaling pathway	6	3	EAC00992, EAC01006, EAC00616
Genes affected by atrazine and carbendazim
GO:0007040	lysosome organization	1	1	EAC00265
GO:0006643	membrane lipid metabolic process	1	1	EAC00265
GO:0006665	sphingolipid metabolic process	1	1	EAC00265
GO:0007033	vacuole organization	1	1	EAC00265
GO:0005975	carbohydrate metabolic process	12	2	EAC00265, EAC01019
Genes affected by all 3 pesticides
GO:0044267	cellular protein metabolic process	56	5	EAC00298. EAC00397, EAC00488, EAC00664, EAC00826
GO:0006486	protein amino acid glycosylation	1	1	EAC00397
GO:0046209	nitric oxide metabolic process	1	1	EAC00488
GO:0042026	protein refolding	1	1	EAC00488
GO:0006470	protein amino acid dephosphorylation	1	1	EAC00664
GO:0007090	regulation of S phase of mitotic cell cycle	1	1	EAC00664
GO:0006464	protein modification process	12	2	EAC00397, EAC00664
GO:0034621	cellular macromolecular complex subunit organization	15	2	EAC00488, EAC00826
GO:0006986	response to unfolded protein	2	1	EAC00488
GO:0006449	regulation of translational termination	2	1	EAC00826
